# Supplementary material for: Effects of Telemedicine on Obese Patients With Non-alcoholic Fatty Liver Disease: A Systematic Review and Meta-Analysis
Source: PubMed Central journal article supplement (PMC8417362; doi:10.3389/fmed.2021.723790), 2021-08-19
Supplement: Data_Sheet_1.pdf [file Data_Sheet_1.pdf]

## **FRONTIERS IN MEDICINE**

### **SUPPLEMENTARY DATA**

#### **Effects of telemedicine on obese patients with non-alcoholic fatty liver disease: a systematic review and meta-analysis**

**Surasak Saokaew<sup>1-6</sup>, Sukrit Kanchanasurakit<sup>1,4</sup>, Chayanis Kositamongkol<sup>7</sup>, Kanyanat Chaiyo<sup>4</sup>, Thirada Jirapisut<sup>4</sup>, Narakorn Aomsin<sup>4</sup>, Pit Leewongsakorn<sup>4</sup>, Nathorn Chaiyakunapruk<sup>8</sup>, Pochamana Phisalprapa<sup>7\*</sup>**

<sup>1</sup>Center of Health Outcomes Research and Therapeutic Safety (Cohorts), School of Pharmaceutical Sciences, University of Phayao, Phayao, Thailand

<sup>2</sup>Unit of Excellence on Clinical Outcomes Research and IntegratioN (UNICORN), School of Pharmaceutical Sciences, University of Phayao, Phayao, Thailand

<sup>3</sup>Unit of Excellence on Herbal Medicine, School of Pharmaceutical Sciences, University of Phayao, Phayao, Thailand

<sup>4</sup>Division of Pharmacy Practice, Department of Pharmaceutical Care, School of Pharmaceutical Sciences, University of Phayao, Phayao, Thailand

<sup>5</sup>Biofunctional Molecule Exploratory Research Group, Biomedicine Research Advancement Centre, School of Pharmacy, Monash University Malaysia, Bandar Sunway, Selangor Darul Ehsan, Malaysia

<sup>6</sup>Novel Bacteria and Drug Discovery Research Group, Microbiome and Bioresource Research Strength, Jeffrey Cheah School of Medicine and Health Sciences, Monash University Malaysia, Bandar Sunway, Selangor Darul Ehsan, Malaysia

<sup>7</sup>Division of Ambulatory Medicine, Department of Medicine, Faculty of Medicine Siriraj Hospital, Mahidol University, Bangkok, Thailand

<sup>8</sup>Department of Pharmacotherapy, College of Pharmacy, University of Utah, Salt Lake City, Utah, USA

#### **\* Correspondence:**

Pochamana Phisalprapa, M.D., Ph.D.

Division of Ambulatory Medicine, Department of Medicine,

Faculty of Medicine Siriraj Hospital, Mahidol University, Bangkok, Thailand, 10700

Tel: +66 2 419 7190; Fax: +66 2 419 7190

E-mail address: [coco\\_a105@hotmail.com](mailto:coco_a105@hotmail.com)

## **TABLE LEGENDS**

**Table S1** Search algorithms

**Table S2** Subgroup analyses

## **FIGURE LEGENDS**

**Figure S1** Risk of bias

**Table S1** Search algorithms

| Database | No  | Step search algorithm                                                                                                                                                                        | Items found |
|----------|-----|----------------------------------------------------------------------------------------------------------------------------------------------------------------------------------------------|-------------|
| Pubmed   | #1  | Search communications media                                                                                                                                                                  | 298927      |
|          | #2  | Search telecommunications                                                                                                                                                                    | 88431       |
|          | #3  | Search telemedicine                                                                                                                                                                          | 28525       |
|          | #4  | Search telenursing                                                                                                                                                                           | 328         |
|          | #5  | Search phone                                                                                                                                                                                 | 27062       |
|          | #6  | Search digital                                                                                                                                                                               | 121795      |
|          | #7  | Search web                                                                                                                                                                                   | 102680      |
|          | #8  | Search mobile                                                                                                                                                                                | 96534       |
|          | #9  | Search application                                                                                                                                                                           | 719575      |
|          | #10 | Search non-alcoholic fatty liver disease                                                                                                                                                     | 14046       |
|          | #11 | Search (((((((communications media) OR telecommunications) OR telemedicine) OR telenursing) OR phone) OR digital) OR web) OR mobile) OR application                                          | 1299753     |
|          | #12 | Search (non-alcoholic fatty liver disease) AND (((((((communications media) OR telecommunications) OR telemedicine) OR telenursing) OR phone) OR digital) OR web) OR mobile) OR application) | <b>641</b>  |
| Scopus   | #1  | Search communications media                                                                                                                                                                  | 6662        |
|          | #2  | Search telecommunications                                                                                                                                                                    | 496688      |
|          | #3  | Search telemedicine                                                                                                                                                                          | 33391       |
|          | #4  | Search telenursing                                                                                                                                                                           | 413         |
|          | #5  | Search phone                                                                                                                                                                                 | 110034      |
|          | #6  | Search digital                                                                                                                                                                               | 1013250     |
|          | #7  | Search web                                                                                                                                                                                   | 486321      |
|          | #8  | Search mobile                                                                                                                                                                                | 659779      |
|          | #9  | Search application                                                                                                                                                                           | 5620186     |
|          | #10 | Search non-alcoholic fatty liver disease                                                                                                                                                     | 11977       |
|          | #11 | Search (((((((communications media) OR telecommunications) OR telemedicine) OR telenursing) OR phone) OR digital) OR web) OR mobile) OR application                                          | 7496202     |
|          | #12 | Search (non-alcoholic fatty liver disease) AND (((((((communications media) OR telecommunications) OR telemedicine) OR telenursing) OR phone) OR digital) OR web) OR mobile) OR application) | <b>329</b>  |
| Cochrane | #1  | Search communications media                                                                                                                                                                  | 34          |
|          | #2  | Search telecommunications                                                                                                                                                                    | 423         |
|          | #3  | Search telemedicine                                                                                                                                                                          | 2527        |
|          | #4  | Search telenursing                                                                                                                                                                           | 55          |
|          | #5  | Search phone                                                                                                                                                                                 | 7214        |
|          | #6  | Search digital                                                                                                                                                                               | 10571       |
|          | #7  | Search web                                                                                                                                                                                   | 6705        |
|          | #8  | Search mobile                                                                                                                                                                                | 17413       |
|          | #9  | Search application                                                                                                                                                                           | 44958       |
|          | #10 | Search non-alcoholic fatty liver disease                                                                                                                                                     | 988         |
|          | #11 | Search (((((((communications media) OR telecommunications) OR telemedicine) OR telenursing) OR phone) OR digital) OR web) OR mobile) OR application                                          | 81559       |
|          | #12 | Search (non-alcoholic fatty liver disease) AND (((((((communications media) OR telecommunications) OR telemedicine) OR telenursing) OR phone) OR digital) OR web) OR mobile) OR application) | <b>87</b>   |

| Database       | No  | Step search algorithm                                                                                                                                                                        | Items found |
|----------------|-----|----------------------------------------------------------------------------------------------------------------------------------------------------------------------------------------------|-------------|
|                |     | telemedicine) OR telenursing) OR phone) OR digital) OR web) OR mobile) OR application)                                                                                                       |             |
| Science direct | #1  | Search communications media                                                                                                                                                                  | 1597        |
|                | #2  | Search telecommunications                                                                                                                                                                    | 91522       |
|                | #3  | Search telemedicine                                                                                                                                                                          | 12673       |
|                | #4  | Search telenursing                                                                                                                                                                           | 122         |
|                | #5  | Search phone                                                                                                                                                                                 | 346853      |
|                | #6  | Search digital                                                                                                                                                                               | 1042030     |
|                | #7  | Search web                                                                                                                                                                                   | 1140794     |
|                | #8  | Search mobile                                                                                                                                                                                | 733817      |
|                | #9  | Search application                                                                                                                                                                           | 5540829     |
|                | #10 | Search non-alcoholic fatty liver disease                                                                                                                                                     | 10988       |
|                | #11 | Search (((((((communications media) OR telecommunications) OR telemedicine) OR telenursing) OR phone) OR digital) OR web) OR mobile) OR application                                          | 6949220     |
|                | #12 | Search (non-alcoholic fatty liver disease) AND (((((((communications media) OR telecommunications) OR telemedicine) OR telenursing) OR phone) OR digital) OR web) OR mobile) OR application) | <b>1605</b> |

**Table S2** Subgroup analyses

| Characteristics      | ALT (U/L)                  |                             |         | AST (U/L)                 |                             |         | Triglyceride levels (mg/dL) |                             |         | HDL-C levels (mg/dL)   |                             |         | BMI (kg/m <sup>2</sup> ) |                             |         |
|----------------------|----------------------------|-----------------------------|---------|---------------------------|-----------------------------|---------|-----------------------------|-----------------------------|---------|------------------------|-----------------------------|---------|--------------------------|-----------------------------|---------|
|                      | WMD<br>(95% CI)            | Heterogeneity               |         | WMD<br>(95% CI)           | Heterogeneity               |         | WMD<br>(95% CI)             | Heterogeneity               |         | WMD<br>(95% CI)        | Heterogeneity               |         | WMD<br>(95% CI)          | Heterogeneity               |         |
|                      |                            | I <sup>2</sup> value<br>(%) | p-value |                           | I <sup>2</sup> value<br>(%) | p-value |                             | I <sup>2</sup> value<br>(%) | p-value |                        | I <sup>2</sup> value<br>(%) | p-value |                          | I <sup>2</sup> value<br>(%) | p-value |
| <b>Study design</b>  |                            |                             |         |                           |                             |         |                             |                             |         |                        |                             |         |                          |                             |         |
| RCT                  | -22.02<br>(-30.64, -13.40) | 46.5                        | 0.172   | -10.31<br>(-13.94, -6.67) | 0.0                         | 0.805   | 14.00<br>(-8.43, 36.43)     | NA                          | NA      | -2.00<br>(-4.60, 0.60) | NA                          | NA      | 0.25<br>(-2.75, 2.26)    | 69.0                        | 0.073   |
| Non-RCT              | -12.80<br>(-21.08, -4.52)  | NA                          | NA      | -10.00<br>(-16.65, -3.35) | NA                          | NA      | -61.40<br>(-113.22, -9.58)  | NA                          | NA      | 12.70<br>(8.25, 17.15) | NA                          | NA      | -3.90<br>(-6.70, -1.10)  | NA                          | NA      |
| <b>Communication</b> |                            |                             |         |                           |                             |         |                             |                             |         |                        |                             |         |                          |                             |         |
| One-way              | -19.00<br>(-24.48, -13.52) | NA                          | NA      | -10.00<br>(-14.38, -5.62) | NA                          | NA      | 14.00<br>(-8.43, 36.43)     | NA                          | NA      | -2.00<br>(-4.60, 0.60) | NA                          | NA      | 1.00<br>(-0.89, 2.89)    | NA                          | NA      |
| Two-way              | -19.91<br>(-35.17, -4.66)  | 76.4                        | 0.039   | -10.50<br>(-15.16, -5.85) | 0.0                         | 0.835   | -61.40<br>(-113.22, -9.58)  | NA                          | NA      | 12.70<br>(8.25, 17.15) | NA                          | NA      | -2.53<br>(-4.79, -0.27)  | 42.6                        | 0.187   |

ALT, alanine aminotransferase; AST, aspartate aminotransferase; BMI, body mass index; CI, confidence interval; HDL-C, high-density lipoprotein cholesterol; NA, not available; WMD, weighted mean difference

(A)

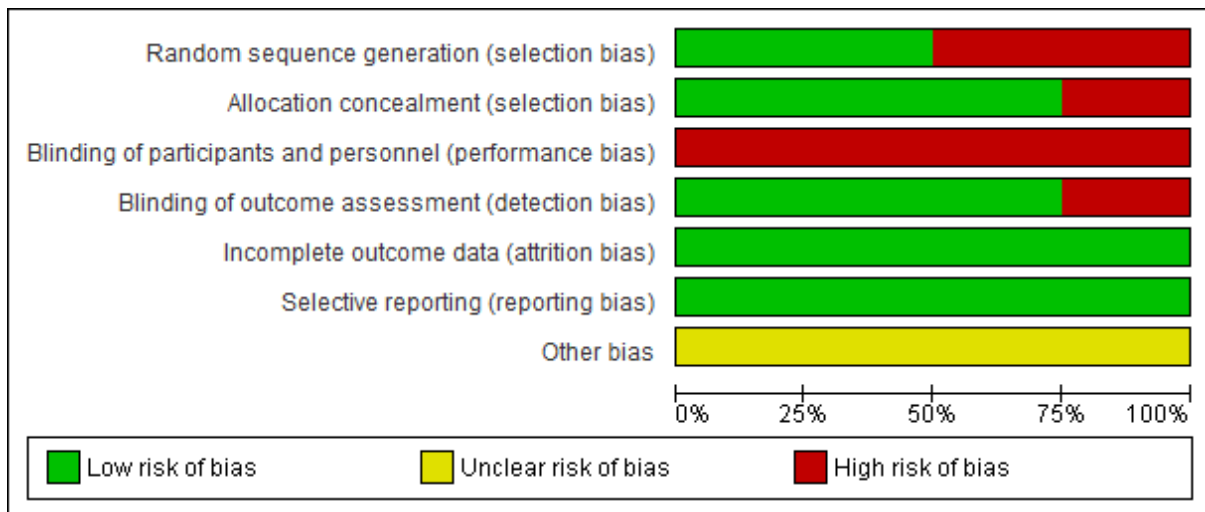

(B)

|                     | Random sequence generation (selection bias) | Allocation concealment (selection bias) | Blinding of participants and personnel (performance bias) | Blinding of outcome assessment (detection bias) | Incomplete outcome data (attrition bias) | Selective reporting (reporting bias) | Other bias |
|---------------------|---------------------------------------------|-----------------------------------------|-----------------------------------------------------------|-------------------------------------------------|------------------------------------------|--------------------------------------|------------|
| Axley P, 2018       | +                                           | +                                       | -                                                         | +                                               | +                                        | +                                    | ?          |
| Fard SJ, 2016       | +                                           | +                                       | -                                                         | +                                               | +                                        | +                                    | ?          |
| Mazzotti A, 2018    | -                                           | -                                       | -                                                         | -                                               | +                                        | +                                    | ?          |
| Vilar-Gomez E, 2018 | -                                           | +                                       | -                                                         | +                                               | +                                        | +                                    | ?          |

**Figure S1** Risk of bias. (A) Risk of bias graph: review authors' judgements on each risk of bias item, presented as percentages across all included studies. (B) Risk of bias summary: review authors' judgements on each risk of bias item for each included study
